# Supplementary material for: Antiretroviral therapy and HIV‐associated cardiovascular disease: a prospective cardiac biomarker and CMR tissue characterization study
Source: PubMed Central journal article supplement (PMC10966217; doi:10.1002/ehf2.14603), 2023-12-15
Supplement: EHF2-11-748-s001.pdf [file EHF2-11-748-s001.pdf]

**Supplement A: Bivariate correlations of parameter change over time in the HIV-infected participants (final follow value up minus baseline value [delta value])**

|                                    |                                    |                         | Correlations       |                     |                     |                     |              |                     | ΔMean              |                     | ΔeGFR                 |
|------------------------------------|------------------------------------|-------------------------|--------------------|---------------------|---------------------|---------------------|--------------|---------------------|--------------------|---------------------|-----------------------|
|                                    |                                    |                         | Δhs-cTnT           | ΔNT-proBNP          | ΔsST2               | ΔGalectin-3         | ΔEthanol     |                     | arterial           | ΔHeart rate         | (ml/min/              |
|                                    |                                    |                         | (ng/l)             | P (ng/l)            | (ng/ml)             | (ng/ml)             | (units/week) | ΔWeight (kg)        | pressure           | (beats/min)         | 1.73 m <sup>2</sup> ) |
|                                    |                                    |                         |                    |                     |                     |                     |              | (mmHg)              |                    |                     |                       |
| Spearman's rho                     | Δhs-cTnT (ng/l)                    | Correlation Coefficient | 1.000              | .110                | .140                | .007                | .006         | -.113               | -.261 <sup>†</sup> | -.005               | -.108                 |
|                                    |                                    | Sig. (2-tailed)         | .                  | .357                | .239                | .951                | .959         | .342                | .026               | .965                | .364                  |
|                                    |                                    | N                       | 73                 | 72                  | 73                  | 73                  | 73           | 73                  | 73                 | 73                  | 73                    |
| ΔNT-proBNP (ng/l)                  | ΔNT-proBNP (ng/l)                  | Correlation Coefficient | .110               | 1.000               | .076                | .346 <sup>**</sup>  | -.069        | -.359 <sup>**</sup> | -.100              | .049                | -.066                 |
|                                    |                                    | Sig. (2-tailed)         | .357               | .                   | .526                | .003                | .563         | .002                | .402               | .682                | .583                  |
|                                    |                                    | N                       | 72                 | 72                  | 72                  | 72                  | 72           | 72                  | 72                 | 72                  | 72                    |
| ΔsST2 (ng/ml)                      | ΔsST2 (ng/ml)                      | Correlation Coefficient | .140               | .076                | 1.000               | .501 <sup>**</sup>  | .143         | -.315 <sup>**</sup> | -.193              | .354 <sup>**</sup>  | -.285 <sup>†</sup>    |
|                                    |                                    | Sig. (2-tailed)         | .239               | .526                | .                   | .000                | .226         | .007                | .101               | .002                | .015                  |
|                                    |                                    | N                       | 73                 | 72                  | 73                  | 73                  | 73           | 73                  | 73                 | 73                  | 73                    |
| ΔGalectin-3 (ng/ml)                | ΔGalectin-3 (ng/ml)                | Correlation Coefficient | .007               | .346 <sup>**</sup>  | .501 <sup>**</sup>  | 1.000               | .132         | -.367 <sup>**</sup> | -.085              | .446 <sup>**</sup>  | -.135                 |
|                                    |                                    | Sig. (2-tailed)         | .951               | .003                | .000                | .                   | .265         | .001                | .474               | .000                | .255                  |
|                                    |                                    | N                       | 73                 | 72                  | 73                  | 73                  | 73           | 73                  | 73                 | 73                  | 73                    |
| ΔEthanol (units/week)              | ΔEthanol (units/week)              | Correlation Coefficient | .006               | -.069               | .143                | .132                | 1.000        | -.047               | -.051              | .018                | -.026                 |
|                                    |                                    | Sig. (2-tailed)         | .959               | .563                | .226                | .265                | .            | .690                | .667               | .877                | .828                  |
|                                    |                                    | N                       | 73                 | 72                  | 73                  | 73                  | 73           | 73                  | 73                 | 73                  | 73                    |
| ΔWeight (kg)                       | ΔWeight (kg)                       | Correlation Coefficient | -.113              | -.359 <sup>**</sup> | -.315 <sup>**</sup> | -.367 <sup>**</sup> | -.047        | 1.000               | .367 <sup>**</sup> | -.240 <sup>†</sup>  | .193                  |
|                                    |                                    | Sig. (2-tailed)         | .342               | .002                | .007                | .001                | .690         | .                   | .001               | .041                | .101                  |
|                                    |                                    | N                       | 73                 | 72                  | 73                  | 73                  | 73           | 73                  | 73                 | 73                  | 73                    |
| ΔMean arterial pressure (mmHg)     | ΔMean arterial pressure (mmHg)     | Correlation Coefficient | -.261 <sup>†</sup> | -.100               | -.193               | -.085               | -.051        | .367 <sup>**</sup>  | 1.000              | -.291 <sup>†</sup>  | .354 <sup>**</sup>    |
|                                    |                                    | Sig. (2-tailed)         | .026               | .402                | .101                | .474                | .667         | .001                | .                  | .013                | .002                  |
|                                    |                                    | N                       | 73                 | 72                  | 73                  | 73                  | 73           | 73                  | 73                 | 73                  | 73                    |
| ΔHeart rate (beats/min)            | ΔHeart rate (beats/min)            | Correlation Coefficient | -.005              | .049                | .354 <sup>**</sup>  | .446 <sup>**</sup>  | .018         | -.240 <sup>†</sup>  | -.291 <sup>†</sup> | 1.000               | -.128                 |
|                                    |                                    | Sig. (2-tailed)         | .965               | .682                | .002                | .000                | .877         | .041                | .013               | .                   | .280                  |
|                                    |                                    | N                       | 73                 | 72                  | 73                  | 73                  | 73           | 73                  | 73                 | 73                  | 73                    |
| ΔeGFR (ml/min/1.73m <sup>2</sup> ) | ΔeGFR (ml/min/1.73m <sup>2</sup> ) | Correlation Coefficient | -.108              | -.066               | -.285 <sup>†</sup>  | -.135               | -.026        | .193                | .354 <sup>**</sup> | -.128               | 1.000                 |
|                                    |                                    | Sig. (2-tailed)         | .364               | .583                | .015                | .255                | .828         | .101                | .002               | .280                | .                     |
|                                    |                                    | N                       | 73                 | 72                  | 73                  | 73                  | 73           | 73                  | 73                 | 73                  | 73                    |
| ΔHIV viral load (log copies/ml)    | ΔHIV viral load (log copies/ml)    | Correlation Coefficient | .246 <sup>†</sup>  | .278 <sup>†</sup>   | .189                | .321 <sup>**</sup>  | .080         | -.180               | -.222              | .248 <sup>†</sup>   | -.011                 |
|                                    |                                    | Sig. (2-tailed)         | .036               | .018                | .109                | .006                | .504         | .129                | .059               | .034                | .924                  |
|                                    |                                    | N                       | 73                 | 72                  | 73                  | 73                  | 73           | 73                  | 73                 | 73                  | 73                    |
| ΔCD4 count (cells/μl)              | ΔCD4 count (cells/μl)              | Correlation Coefficient | -.114              | -.130               | -.086               | -.128               | .008         | .197                | .059               | -.378 <sup>**</sup> | .019                  |
|                                    |                                    | Sig. (2-tailed)         | .339               | .275                | .470                | .280                | .947         | .095                | .620               | .001                | .875                  |
|                                    |                                    | N                       | 73                 | 72                  | 73                  | 73                  | 73           | 73                  | 73                 | 73                  | 73                    |
| ΔLV EF (%)                         | ΔLV EF (%)                         | Correlation Coefficient | -.062              | -.129               | -.194               | -.193               | .016         | .063                | .041               | -.130               | .143                  |
|                                    |                                    | Sig. (2-tailed)         | .604               | .279                | .100                | .101                | .893         | .596                | .728               | .274                | .228                  |
|                                    |                                    | N                       | 73                 | 72                  | 73                  | 73                  | 73           | 73                  | 73                 | 73                  | 73                    |
| ΔLV EDV for height (ml/m)          | ΔLV EDV for height (ml/m)          | Correlation Coefficient | -.091              | .224                | -.375 <sup>**</sup> | -.322 <sup>**</sup> | .028         | .322 <sup>**</sup>  | .370 <sup>**</sup> | -.541 <sup>**</sup> | .261 <sup>†</sup>     |
|                                    |                                    | Sig. (2-tailed)         | .445               | .058                | .001                | .005                | .813         | .005                | .001               | .000                | .026                  |
|                                    |                                    | N                       | 73                 | 72                  | 73                  | 73                  | 73           | 73                  | 73                 | 73                  | 73                    |



|                                    |                         |         |         |         |         |       |         |        |         |         |
|------------------------------------|-------------------------|---------|---------|---------|---------|-------|---------|--------|---------|---------|
|                                    | N                       | 73      | 73      | 73      | 73      | 72    | 72      | 72     | 73      | 68      |
| ΔMean arterial pressure (mmHg)     | Correlation Coefficient | -.222   | .059    | .041    | .370**  | -.055 | .083    | -.206  | -.071   | -.341** |
|                                    | Sig. (2-tailed)         | .059    | .620    | .728    | .001    | .646  | .486    | .082   | .552    | .004    |
|                                    | N                       | 73      | 73      | 73      | 73      | 72    | 72      | 72     | 73      | 68      |
| ΔHeart rate (beats/min)            | Correlation Coefficient | .248*   | -.378** | -.130   | -.541** | -.173 | -.385** | .469** | -.140   | .062    |
|                                    | Sig. (2-tailed)         | .034    | .001    | .274    | .000    | .146  | .001    | .000   | .237    | .614    |
|                                    | N                       | 73      | 73      | 73      | 73      | 72    | 72      | 72     | 73      | 68      |
| ΔeGFR (ml/min/1.73m <sup>2</sup> ) | Correlation Coefficient | -.011   | .019    | .143    | .261*   | .029  | -.011   | -.060  | .106    | -.052   |
|                                    | Sig. (2-tailed)         | .924    | .875    | .228    | .026    | .810  | .925    | .620   | .373    | .672    |
|                                    | N                       | 73      | 73      | 73      | 73      | 72    | 72      | 72     | 73      | 68      |
| ΔHIV viral load (log copies/ml)    | Correlation Coefficient | 1.000   | -.367** | -.231*  | -.146   | -.034 | .054    | .391** | .295*   | .267*   |
|                                    | Sig. (2-tailed)         | .       | .001    | .050    | .217    | .779  | .654    | .001   | .011    | .028    |
|                                    | N                       | 73      | 73      | 73      | 73      | 72    | 72      | 72     | 73      | 68      |
| ΔCD4 count (cells/μl)              | Correlation Coefficient | -.367** | 1.000   | .107    | .162    | .232  | .131    | -.282* | -.049   | -.033   |
|                                    | Sig. (2-tailed)         | .001    | .       | .370    | .172    | .050  | .271    | .017   | .678    | .792    |
|                                    | N                       | 73      | 73      | 73      | 73      | 72    | 72      | 72     | 73      | 68      |
| ΔLV EF (%)                         | Correlation Coefficient | -.231*  | .107    | 1.000   | .023    | -.133 | .001    | -.166  | -.313** | .036    |
|                                    | Sig. (2-tailed)         | .050    | .370    | .       | .848    | .266  | .993    | .163   | .007    | .773    |
|                                    | N                       | 73      | 73      | 73      | 73      | 72    | 72      | 72     | 73      | 68      |
| ΔLV EDV for height (ml/m)          | Correlation Coefficient | -.146   | .162    | .023    | 1.000   | .047  | .181    | -.139  | .191    | -.099   |
|                                    | Sig. (2-tailed)         | .217    | .172    | .848    | .       | .697  | .127    | .244   | .106    | .420    |
|                                    | N                       | 73      | 73      | 73      | 73      | 72    | 72      | 72     | 73      | 68      |
| ΔSTIR SIR                          | Correlation Coefficient | -.034   | .232    | -.133   | .047    | 1.000 | .284*   | -.020  | .153    | -.023   |
|                                    | Sig. (2-tailed)         | .779    | .050    | .266    | .697    | .     | .017    | .868   | .200    | .851    |
|                                    | N                       | 72      | 72      | 72      | 72      | 72    | 71      | 71     | 72      | 67      |
| ΔEGE SIR                           | Correlation Coefficient | .054    | .131    | .001    | .181    | .284* | 1.000   | -.196  | .026    | .001    |
|                                    | Sig. (2-tailed)         | .654    | .271    | .993    | .127    | .017  | .       | .101   | .829    | .995    |
|                                    | N                       | 72      | 72      | 72      | 72      | 71    | 72      | 71     | 72      | 68      |
| ΔGlobal native T1 (ms)             | Correlation Coefficient | .391**  | -.282*  | -.166   | -.139   | -.020 | -.196   | 1.000  | .426**  | .565**  |
|                                    | Sig. (2-tailed)         | .001    | .017    | .163    | .244    | .868  | .101    | .      | .000    | .000    |
|                                    | N                       | 72      | 72      | 72      | 72      | 71    | 71      | 72     | 72      | 68      |
| ΔGlobal T2 (ms)                    | Correlation Coefficient | .295*   | -.049   | -.313** | .191    | .153  | .026    | .426** | 1.000   | .343**  |
|                                    | Sig. (2-tailed)         | .011    | .678    | .007    | .106    | .200  | .829    | .000   | .       | .004    |
|                                    | N                       | 73      | 73      | 73      | 73      | 72    | 72      | 72     | 73      | 68      |
| ΔGlobal ECV (ms)                   | Correlation Coefficient | .267*   | -.033   | .036    | -.099   | -.023 | .001    | .565** | .343**  | 1.000   |
|                                    | Sig. (2-tailed)         | .028    | .792    | .773    | .420    | .851  | .995    | .000   | .004    | .       |
|                                    | N                       | 68      | 68      | 68      | 68      | 67    | 68      | 68     | 68      | 68      |
| ΔCD8 count (cells/μl)              | Correlation Coefficient | .142    | .256*   | .069    | .243*   | -.007 | .110    | -.152  | .020    | -.232   |
|                                    | Sig. (2-tailed)         | .232    | .029    | .561    | .038    | .953  | .359    | .204   | .869    | .057    |
|                                    | N                       | 73      | 73      | 73      | 73      | 72    | 72      | 72     | 73      | 68      |
| ΔCreatinine (μmol/l)               | Correlation Coefficient | -.096   | -.067   | -.135   | -.057   | .006  | -.015   | -.071  | .004    | -.105   |
|                                    | Sig. (2-tailed)         | .421    | .579    | .258    | .633    | .960  | .904    | .558   | .976    | .398    |
|                                    | N                       | 72      | 72      | 72      | 72      | 71    | 71      | 71     | 72      | 67      |
| Δhigh sensitivity CRP (mg/l)       | Correlation Coefficient | .091    | -.096   | .034    | -.178   | -.114 | -.178   | .525** | .122    | .334**  |
|                                    | Sig. (2-tailed)         | .444    | .419    | .777    | .132    | .341  | .135    | .000   | .304    | .005    |
|                                    | N                       | 73      | 73      | 73      | 73      | 72    | 72      | 72     | 73      | 68      |

## Correlations

|                |                                    |                         | ΔCD8 count (cells/μl) | ΔCreatinine (μmol/l) | Δhigh sensitivity CRP (mg/l) |
|----------------|------------------------------------|-------------------------|-----------------------|----------------------|------------------------------|
| Spearman's rho | Δhs-cTnT (ng/l)                    | Correlation Coefficient | -.018                 | .148                 | .003                         |
|                |                                    | Sig. (2-tailed)         | .883                  | .213                 | .982                         |
|                |                                    | N                       | 73                    | 72                   | 73                           |
|                | ΔNT-proBNP (ng/l)                  | Correlation Coefficient | .060                  | -.090                | .243 <sup>*</sup>            |
|                |                                    | Sig. (2-tailed)         | .619                  | .456                 | .040                         |
|                |                                    | N                       | 72                    | 71                   | 72                           |
|                | ΔsST2 (ng/ml)                      | Correlation Coefficient | .065                  | .034                 | .182                         |
|                |                                    | Sig. (2-tailed)         | .586                  | .779                 | .124                         |
|                |                                    | N                       | 73                    | 72                   | 73                           |
|                | ΔGalectin-3 (ng/ml)                | Correlation Coefficient | .045                  | -.090                | .348 <sup>**</sup>           |
|                |                                    | Sig. (2-tailed)         | .703                  | .450                 | .003                         |
|                |                                    | N                       | 73                    | 72                   | 73                           |
|                | ΔEthanol (units/week)              | Correlation Coefficient | .135                  | -.145                | -.045                        |
|                |                                    | Sig. (2-tailed)         | .256                  | .224                 | .703                         |
|                |                                    | N                       | 73                    | 72                   | 73                           |
|                | ΔWeight (kg)                       | Correlation Coefficient | .077                  | .272 <sup>*</sup>    | -.091                        |
|                |                                    | Sig. (2-tailed)         | .516                  | .021                 | .446                         |
|                |                                    | N                       | 73                    | 72                   | 73                           |
|                | ΔMean arterial pressure (mmHg)     | Correlation Coefficient | .272 <sup>*</sup>     | -.138                | -.138                        |
|                |                                    | Sig. (2-tailed)         | .020                  | .247                 | .245                         |
|                |                                    | N                       | 73                    | 72                   | 73                           |
|                | ΔHeart rate (beats/min)            | Correlation Coefficient | -.055                 | -.035                | .338 <sup>**</sup>           |
|                |                                    | Sig. (2-tailed)         | .646                  | .770                 | .003                         |
|                |                                    | N                       | 73                    | 72                   | 73                           |
|                | ΔeGFR (ml/min/1.73m <sup>2</sup> ) | Correlation Coefficient | .151                  | -.731 <sup>**</sup>  | -.053                        |
|                |                                    | Sig. (2-tailed)         | .203                  | .000                 | .658                         |
|                |                                    | N                       | 73                    | 72                   | 73                           |
|                | ΔHIV viral load (log copies/ml)    | Correlation Coefficient | .142                  | -.096                | .091                         |
|                |                                    | Sig. (2-tailed)         | .232                  | .421                 | .444                         |
|                |                                    | N                       | 73                    | 72                   | 73                           |
|                | ΔCD4 count (cells/μl)              | Correlation Coefficient | .256 <sup>*</sup>     | -.067                | -.096                        |
|                |                                    | Sig. (2-tailed)         | .029                  | .579                 | .419                         |
|                |                                    | N                       | 73                    | 72                   | 73                           |
|                | ΔLV EF (%)                         | Correlation Coefficient | .069                  | -.135                | .034                         |
|                |                                    | Sig. (2-tailed)         | .561                  | .258                 | .777                         |
|                |                                    | N                       | 73                    | 72                   | 73                           |
|                | ΔLV EDV for height (ml/m)          | Correlation Coefficient | .243 <sup>*</sup>     | -.057                | -.178                        |
|                |                                    | Sig. (2-tailed)         | .038                  | .633                 | .132                         |
|                |                                    | N                       | 73                    | 72                   | 73                           |
|                | ΔSTIR SIR                          | Correlation Coefficient | -.007                 | .006                 | -.114                        |
|                |                                    | Sig. (2-tailed)         | .953                  | .960                 | .341                         |
|                |                                    | N                       | 72                    | 71                   | 72                           |

|                              |                         |        |       |        |
|------------------------------|-------------------------|--------|-------|--------|
| ΔEGE SIR                     | Correlation Coefficient | .110   | -.015 | -.178  |
|                              | Sig. (2-tailed)         | .359   | .904  | .135   |
|                              | N                       | 72     | 71    | 72     |
| ΔGlobal native T1 (ms)       | Correlation Coefficient | -.152  | -.071 | .525** |
|                              | Sig. (2-tailed)         | .204   | .558  | .000   |
|                              | N                       | 72     | 71    | 72     |
| ΔGlobal T2 (ms)              | Correlation Coefficient | .020   | .004  | .122   |
|                              | Sig. (2-tailed)         | .869   | .976  | .304   |
|                              | N                       | 73     | 72    | 73     |
| ΔGlobal ECV (ms)             | Correlation Coefficient | -.232  | -.105 | .334** |
|                              | Sig. (2-tailed)         | .057   | .398  | .005   |
|                              | N                       | 68     | 67    | 68     |
| ΔCD8 count (cells/μl)        | Correlation Coefficient | 1.000  | -.225 | -.246* |
|                              | Sig. (2-tailed)         | .      | .057  | .036   |
|                              | N                       | 73     | 72    | 73     |
| ΔCreatinine (μmol/l)         | Correlation Coefficient | -.225  | 1.000 | .055   |
|                              | Sig. (2-tailed)         | .057   | .     | .646   |
|                              | N                       | 72     | 72    | 72     |
| Δhigh sensitivity CRP (mg/l) | Correlation Coefficient | -.246* | .055  | 1.000  |
|                              | Sig. (2-tailed)         | .036   | .646  | .      |
|                              | N                       | 73     | 72    | 73     |

\*. Correlation is significant at the 0.05 level (2-tailed).

\*\*. Correlation is significant at the 0.01 level (2-tailed).

hs-cTnT = high sensitivity cardiac troponin T; NT-proBNP = N-terminal pro B-type natriuretic peptide; sST2 = soluble ST2; CRP = C-reactive protein; eGFR = estimated glomerular filtration rate; LA = left atrium; RA = right atrium; LV = left ventricle; EDV = end diastolic volume; STIR = short tau inversion recovery; SIR = skeletal muscle to myocardial signal intensity ratio; EGE = early gadolinium enhancement; RV = right ventricle; EF = ejection fraction; ECV = extracellular volume mapping





|  |                 |      |      |      |      |      |      |      |      |      |      |
|--|-----------------|------|------|------|------|------|------|------|------|------|------|
|  | Sig. (2-tailed) | .181 | .000 | .452 | .001 | .010 | .000 | .000 | .001 | .008 | .006 |
|  | N               | 141  | 140  | 141  | 141  | 141  | 141  | 141  | 141  | 141  | 141  |

|                                   |                         |                         | Correlations   |                    |                    |                    |                    |                   |            |       |         |           |     |
|-----------------------------------|-------------------------|-------------------------|----------------|--------------------|--------------------|--------------------|--------------------|-------------------|------------|-------|---------|-----------|-----|
|                                   |                         |                         | eGFR           | Creatinine         | LA area            | RA area            | LV mass for        | LV EDV for        | RV EDV for | LV EF | RV EF   | Global    |     |
|                                   |                         |                         | (ml/min/1.73   | ( $\mu$ mol/l)     | (cm <sup>2</sup> ) | (cm <sup>2</sup> ) | height (g/m)       | height            | height     | (%)   | (%)     | native T1 |     |
|                                   |                         |                         | m <sup>2</sup> | ( $\mu$ mol/l)     | (cm <sup>2</sup> ) | (cm <sup>2</sup> ) | height (g/m)       | (ml/m)            | (ml/m)     | (%)   | (%)     | (ms)      |     |
| Spearman's rho                    | hs-cTnT (ng/l)          | Correlation Coefficient | -.055          | .357**             | .123               | .316**             | .314**             | .310**            | .292**     | -.122 | -.104   | -.288**   |     |
|                                   |                         | Sig. (2-tailed)         | .510           | .000               | .140               | .000               | .000               | .000              | .000       | .143  | .212    | .000      |     |
|                                   |                         | N                       | 146            | 146                | 146                | 146                | 146                | 146               | 146        | 146   | 146     | 146       | 145 |
|                                   |                         |                         |                |                    |                    |                    |                    |                   |            |       |         |           |     |
|                                   | NT-proBNP(ng/l)         | Correlation Coefficient | .007           | -.259**            | .044               | -.080              | -.179 <sup>†</sup> | -.003             | -.057      | -.036 | .076    | .402**    |     |
|                                   |                         | Sig. (2-tailed)         | .929           | .002               | .602               | .338               | .031               | .974              | .494       | .669  | .365    | .000      |     |
|                                   |                         | N                       | 145            | 145                | 145                | 145                | 145                | 145               | 145        | 145   | 145     | 144       |     |
|                                   |                         |                         |                |                    |                    |                    |                    |                   |            |       |         |           |     |
|                                   | sST2 (ng/ml)            | Correlation Coefficient | -.100          | .169 <sup>†</sup>  | .151               | .144               | .303**             | .253**            | .272**     | -.113 | -.126   | -.115     |     |
|                                   |                         | Sig. (2-tailed)         | .230           | .042               | .069               | .083               | .000               | .002              | .001       | .175  | .129    | .167      |     |
|                                   |                         | N                       | 146            | 146                | 146                | 146                | 146                | 146               | 146        | 146   | 146     | 145       |     |
|                                   |                         |                         |                |                    |                    |                    |                    |                   |            |       |         |           |     |
| Galectin-3 (ng/ml)                | Correlation Coefficient | -.263**                 | .078           | -.034              | -.194 <sup>†</sup> | -.081              | -.116              | -.136             | -.122      | -.013 | .245**  |           |     |
|                                   | Sig. (2-tailed)         | .001                    | .347           | .685               | .019               | .329               | .162               | .102              | .142       | .880  | .003    |           |     |
|                                   | N                       | 146                     | 146            | 146                | 146                | 146                | 146                | 146               | 146        | 146   | 146     | 145       |     |
|                                   |                         |                         |                |                    |                    |                    |                    |                   |            |       |         |           |     |
| Mean Arterial Pressure (mmHg)     | Correlation Coefficient | .253**                  | .000           | .205 <sup>†</sup>  | .230**             | .311**             | .146               | .172 <sup>†</sup> | .073       | -.085 | -.243** |           |     |
|                                   | Sig. (2-tailed)         | .002                    | .999           | .013               | .005               | .000               | .078               | .038              | .384       | .310  | .003    |           |     |
|                                   | N                       | 146                     | 146            | 146                | 146                | 146                | 146                | 146               | 146        | 146   | 146     | 145       |     |
|                                   |                         |                         |                |                    |                    |                    |                    |                   |            |       |         |           |     |
| Weight (kg)                       | Correlation Coefficient | .461**                  | .275**         | .383**             | .497**             | .382**             | .313**             | .301**            | .025       | .002  | -.348** |           |     |
|                                   | Sig. (2-tailed)         | .000                    | .001           | .000               | .000               | .000               | .000               | .000              | .767       | .984  | .000    |           |     |
|                                   | N                       | 146                     | 146            | 146                | 146                | 146                | 146                | 146               | 146        | 146   | 146     | 145       |     |
|                                   |                         |                         |                |                    |                    |                    |                    |                   |            |       |         |           |     |
| 6-Minute walk test - distance (m) | Correlation Coefficient | -.056                   | .383**         | .339**             | .442**             | .432**             | .435**             | .407**            | -.124      | -.098 | -.401** |           |     |
|                                   | Sig. (2-tailed)         | .502                    | .000           | .000               | .000               | .000               | .000               | .000              | .136       | .238  | .000    |           |     |
|                                   | N                       | 146                     | 146            | 146                | 146                | 146                | 146                | 146               | 146        | 146   | 146     | 145       |     |
|                                   |                         |                         |                |                    |                    |                    |                    |                   |            |       |         |           |     |
| High sensitivity CRP (mg/l)       | Correlation Coefficient | -.069                   | -.050          | -.021              | -.012              | .044               | -.036              | -.008             | -.013      | -.085 | .266**  |           |     |
|                                   | Sig. (2-tailed)         | .408                    | .547           | .801               | .886               | .595               | .666               | .928              | .872       | .309  | .001    |           |     |
|                                   | N                       | 146                     | 146            | 146                | 146                | 146                | 146                | 146               | 146        | 146   | 146     | 145       |     |
|                                   |                         |                         |                |                    |                    |                    |                    |                   |            |       |         |           |     |
| CD4 count (cells/ $\mu$ l)        | Correlation Coefficient | .108                    | .015           | .210 <sup>†</sup>  | .226**             | .168 <sup>†</sup>  | .165 <sup>†</sup>  | .238**            | .065       | -.011 | -.219** |           |     |
|                                   | Sig. (2-tailed)         | .194                    | .861           | .011               | .006               | .043               | .046               | .004              | .436       | .894  | .008    |           |     |
|                                   | N                       | 146                     | 146            | 146                | 146                | 146                | 146                | 146               | 146        | 146   | 146     | 145       |     |
|                                   |                         |                         |                |                    |                    |                    |                    |                   |            |       |         |           |     |
| HIV viral load (log copies/ml)    | Correlation Coefficient | .146                    | -.246**        | -.209 <sup>†</sup> | -.159              | -.026              | -.163 <sup>†</sup> | -.125             | -.016      | -.099 | .311**  |           |     |
|                                   | Sig. (2-tailed)         | .079                    | .003           | .011               | .055               | .751               | .049               | .134              | .846       | .236  | .000    |           |     |
|                                   | N                       | 146                     | 146            | 146                | 146                | 146                | 146                | 146               | 146        | 146   | 146     | 145       |     |
|                                   |                         |                         |                |                    |                    |                    |                    |                   |            |       |         |           |     |





|                 |      |      |      |      |      |      |      |      |      |      |
|-----------------|------|------|------|------|------|------|------|------|------|------|
| Sig. (2-tailed) | .418 | .000 | .069 | .000 | .002 | .003 | .001 | .783 | .232 | .000 |
| N               | 141  | 141  | 141  | 141  | 141  | 141  | 141  | 141  | 141  | 141  |

**Correlations**

|                                            |                                   |                         | Global T2 (ms) | Global ECV (ms) |
|--------------------------------------------|-----------------------------------|-------------------------|----------------|-----------------|
| Spearman's rho                             | hs-cTnT (ng/l)                    | Correlation Coefficient | -.053          | -.113           |
|                                            |                                   | Sig. (2-tailed)         | .528           | .181            |
|                                            |                                   | N                       | 146            | 141             |
|                                            | NT-proBNP(ng/l)                   | Correlation Coefficient | .465**         | .440**          |
|                                            |                                   | Sig. (2-tailed)         | .000           | .000            |
|                                            |                                   | N                       | 145            | 140             |
|                                            | sST2 (ng/ml)                      | Correlation Coefficient | -.016          | .064            |
|                                            |                                   | Sig. (2-tailed)         | .847           | .452            |
|                                            |                                   | N                       | 146            | 141             |
|                                            | Galectin-3 (ng/ml)                | Correlation Coefficient | .290**         | .274**          |
|                                            |                                   | Sig. (2-tailed)         | .000           | .001            |
|                                            |                                   | N                       | 146            | 141             |
|                                            | Mean Arterial Pressure (mmHg)     | Correlation Coefficient | -.244**        | -.216*          |
|                                            |                                   | Sig. (2-tailed)         | .003           | .010            |
|                                            |                                   | N                       | 146            | 141             |
|                                            | Weight (kg)                       | Correlation Coefficient | -.285**        | -.385**         |
|                                            |                                   | Sig. (2-tailed)         | .000           | .000            |
|                                            |                                   | N                       | 146            | 141             |
|                                            | 6-Minute walk test - distance (m) | Correlation Coefficient | -.252**        | -.421**         |
|                                            |                                   | Sig. (2-tailed)         | .002           | .000            |
|                                            |                                   | N                       | 146            | 141             |
| High sensitivity CRP (mg/l)                | Correlation Coefficient           | .154                    | .274**         |                 |
|                                            | Sig. (2-tailed)                   | .064                    | .001           |                 |
|                                            | N                                 | 146                     | 141            |                 |
| CD4 count (cells/ $\mu$ l)                 | Correlation Coefficient           | -.209*                  | -.221**        |                 |
|                                            | Sig. (2-tailed)                   | .011                    | .008           |                 |
|                                            | N                                 | 146                     | 141            |                 |
| HIV viral load (log copies/ml)             | Correlation Coefficient           | .126                    | .232**         |                 |
|                                            | Sig. (2-tailed)                   | .129                    | .006           |                 |
|                                            | N                                 | 146                     | 141            |                 |
| Absolute eGFR (ml/min/1.73m <sup>2</sup> ) | Correlation Coefficient           | -.160                   | -.069          |                 |
|                                            | Sig. (2-tailed)                   | .054                    | .418           |                 |
|                                            | N                                 | 146                     | 141            |                 |
| Creatinine ( $\mu$ mol/l)                  | Correlation Coefficient           | -.181*                  | -.407**        |                 |
|                                            | Sig. (2-tailed)                   | .029                    | .000           |                 |
|                                            | N                                 | 146                     | 141            |                 |
| LA area (cm2)                              | Correlation Coefficient           | .096                    | -.154          |                 |
|                                            | Sig. (2-tailed)                   | .249                    | .069           |                 |
|                                            | N                                 | 146                     | 141            |                 |
| RA area (cm2)                              | Correlation Coefficient           | -.166*                  | -.383**        |                 |
|                                            | Sig. (2-tailed)                   | .046                    | .000           |                 |

|                             |                         |        |         |
|-----------------------------|-------------------------|--------|---------|
|                             | N                       | 146    | 141     |
| LV mass for height (g/m)    | Correlation Coefficient | -.165* | -.255** |
|                             | Sig. (2-tailed)         | .046   | .002    |
|                             | N                       | 146    | 141     |
| LV EDV for height (ml/m)    | Correlation Coefficient | -.023  | -.250** |
|                             | Sig. (2-tailed)         | .782   | .003    |
|                             | N                       | 146    | 141     |
| RV EDV for height (ml/m)    | Correlation Coefficient | -.109  | -.277** |
|                             | Sig. (2-tailed)         | .189   | .001    |
|                             | N                       | 146    | 141     |
| LV EF (%)                   | Correlation Coefficient | -.151  | .023    |
|                             | Sig. (2-tailed)         | .070   | .783    |
|                             | N                       | 146    | 141     |
| RV EF (%)                   | Correlation Coefficient | .042   | .101    |
|                             | Sig. (2-tailed)         | .611   | .232    |
|                             | N                       | 146    | 141     |
| Global T1 Time Average (ms) | Correlation Coefficient | .522** | .732**  |
|                             | Sig. (2-tailed)         | .000   | .000    |
|                             | N                       | 145    | 141     |
| Global T2 average (ms)      | Correlation Coefficient | 1.000  | .579**  |
|                             | Sig. (2-tailed)         | .      | .000    |
|                             | N                       | 146    | 141     |
| Global ECV average (ms)     | Correlation Coefficient | .579** | 1.000   |
|                             | Sig. (2-tailed)         | .000   | .       |
|                             | N                       | 141    | 141     |

\*\* . Correlation is significant at the 0.01 level (2-tailed).

\* . Correlation is significant at the 0.05 level (2-tailed).

hs-cTnT = high sensitivity cardiac troponin T; NT-proBNP = N-terminal pro B-type natriuretic peptide; sST2 = soluble ST2; CRP = C-reactive protein; eGFR = estimated glomerular filtration rate; LA = left atrium;

RA = right atrium; LV = left ventricle; EDV = end diastolic volume; RV = right ventricle; EF = ejection fraction; ECV = extracellular volume mapping
